# Supplementary material for: Structural and Biochemical Characterization of Thioredoxin-2 from Deinococcus radiodurans
Source: MDPI journal article supplement (doi:10.3390/antiox10111843), 2021-11-20
Supplement: s1 [file s1]

# Supplementary Information

## 1. Supplementary Figures

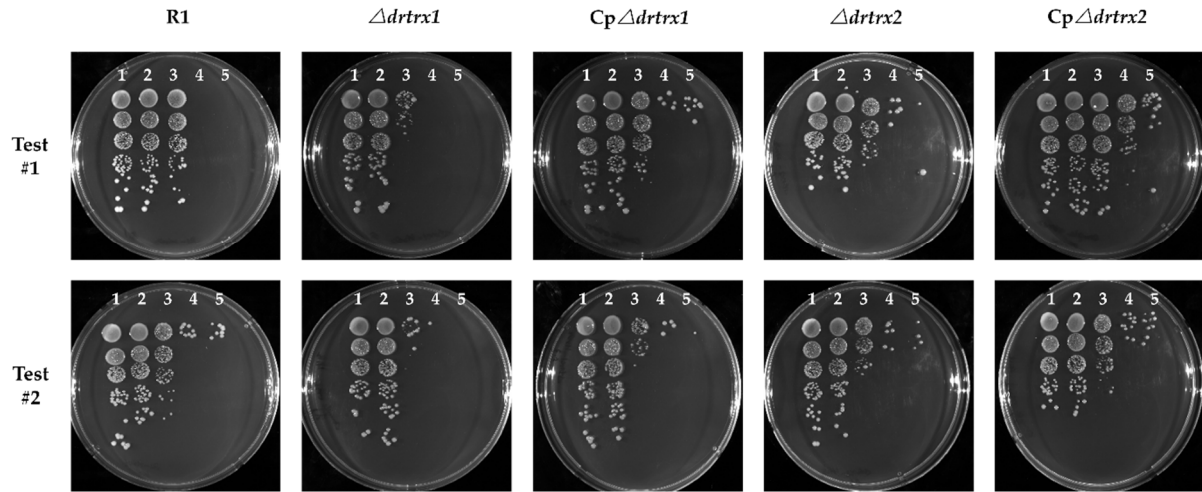

**Figure S1. Complementation of  $\Delta\text{drtrx1}$  and  $\Delta\text{drtrx2}$ .** *D. radiodurans* wild-type,  $\Delta\text{drtrx1}$  harboring the *drtrx1* expression plasmid ( $\text{Cp}\Delta\text{drtrx1}$ ), and  $\Delta\text{drtrx2}$  harboring the *drtrx2* expression plasmid ( $\text{Cp}\Delta\text{drtrx2}$ ) were spotted on TGY plates supplemented with 0 (1), 20 (2), 40 (3), 60 (4), and 80 (5) mM  $\text{H}_2\text{O}_2$ . The plates were incubated for 2 days at 30 °C prior to the enumeration of colonies.

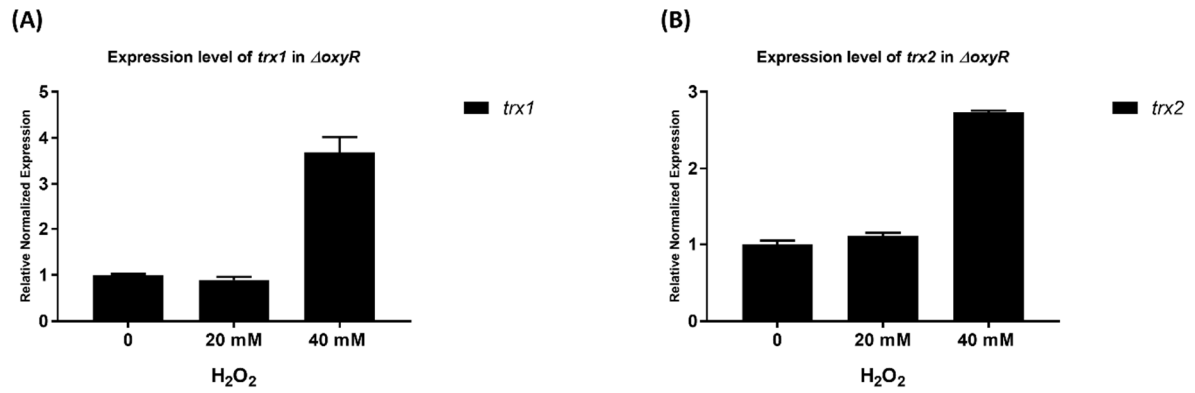

**Figure S2. Transcription of *drtrx1* and *drtrx2* in  $\Delta droxyR$  mutant under H<sub>2</sub>O<sub>2</sub> stress.** *D. radiodurans*  $\Delta droxyR$  mutant was exposed to 0, 20, and 40 mM H<sub>2</sub>O<sub>2</sub>, then qRT-PCR analysis was performed to determine *drtrx1* (A) and *drtrx2* (B) transcription level. The fold increase of transcription was determined by setting the expression level of the non-treated control as 1. Error bars indicate the standard deviation for three experimental replicates.

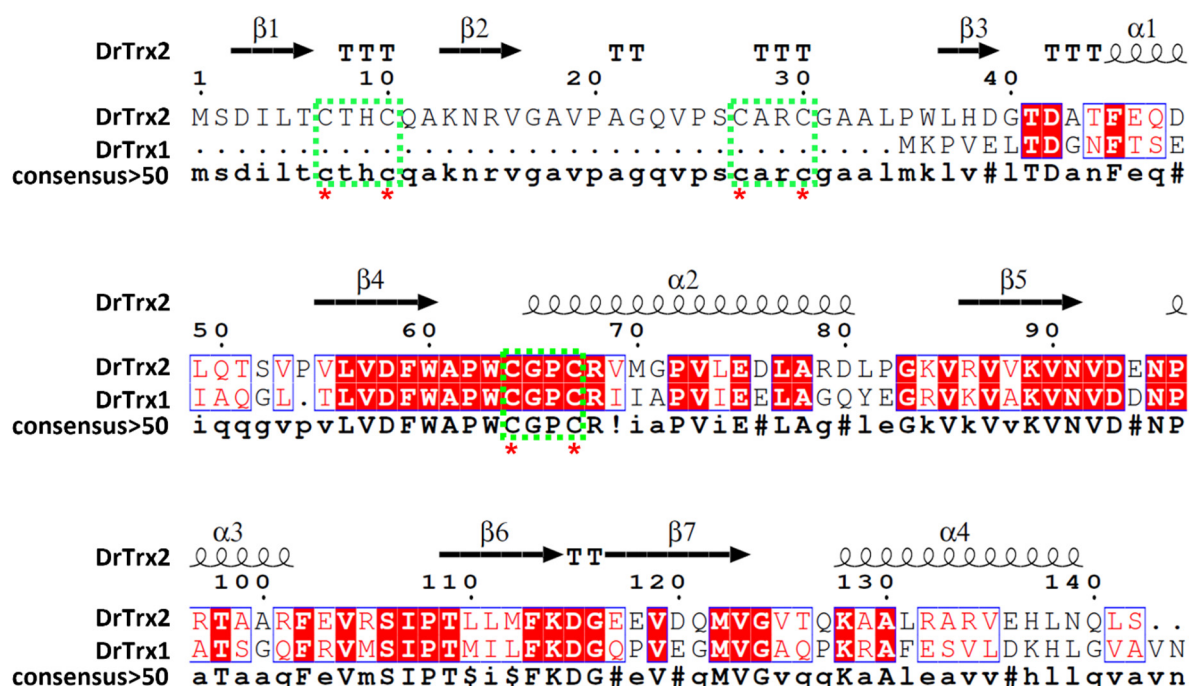

**Figure S3. The structure-based sequence alignment of DrTrx2 with DrTrx1.** The programs, Multalign (<http://multalin.toulouse.inra.fr>) and Esript (<http://esript.ibcp.fr>), were used to visualize the alignment. White letters on red shading represent 100% identity. Cysteine residues in the active site CXXC motif and the zinc-binding domain of DrTrx2 are marked with green dotted rectangles and red asterisks.

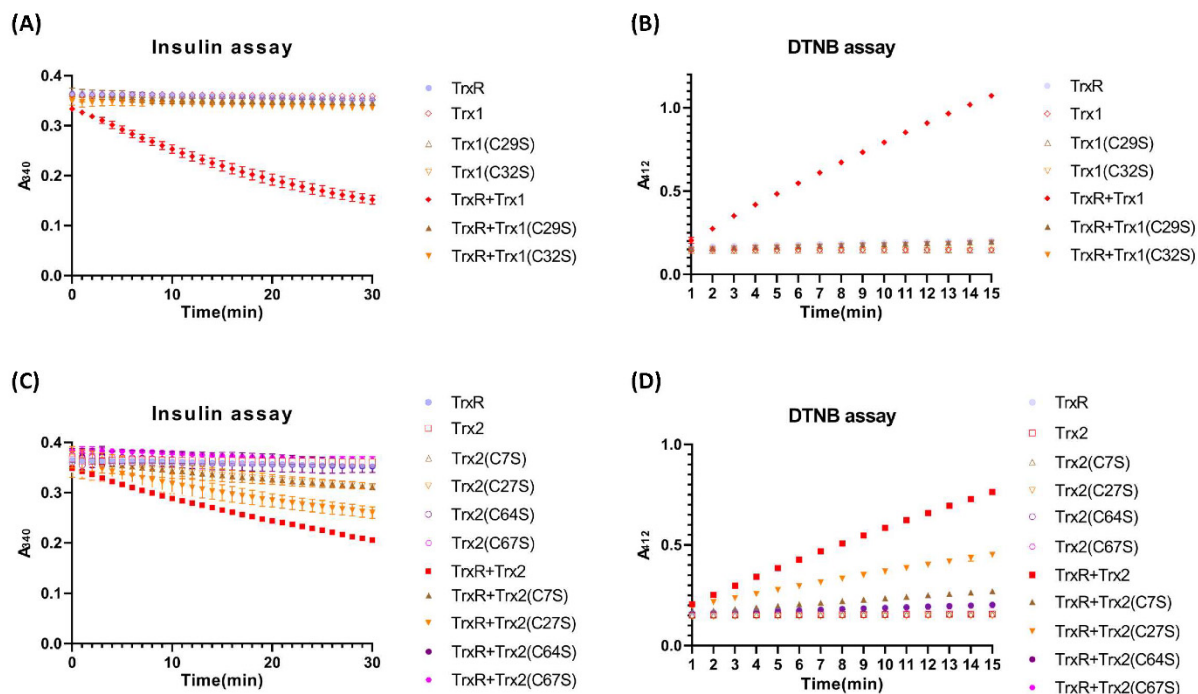

**Figure S4. Reduction of insulin and DTNB by cysteine mutant Trx proteins.** Reduction of insulin by DrTrx1, DrTrx1<sup>C29S</sup>, and DrTrx1<sup>C32S</sup> (0.1  $\mu$ M) (A) and DrTrx2, DrTrx2<sup>C7S</sup>, DrTrx2<sup>C27S</sup>, DrTrx2<sup>C64S</sup>, and DrTrx2<sup>C67S</sup> (0.5  $\mu$ M) (C) coupled to the DrTrxR/NADPH regeneration system. Negative controls are the omission of DrTrxR in the presence of each Trx protein or omission of Trx protein in the presence of DrTrxR. Reduction of DTNB by DrTrx1, DrTrx1<sup>C29S</sup>, and DrTrx1<sup>C32S</sup> (0.1  $\mu$ M) (B) and DrTrx2, DrTrx2<sup>C7S</sup>, DrTrx2<sup>C27S</sup>, DrTrx2<sup>C64S</sup>, and DrTrx2<sup>C67S</sup> (0.5  $\mu$ M) (D) coupled to the DrTrxR/NADPH regeneration system. Negative controls are the omission of DrTrxR in the presence of each Trx protein or omission of Trx protein in the presence of DrTrxR. The reduction of insulin (A, C) was recorded by measuring the decrease of NADPH oxidation at 340 nm. The reduction of DTNB was recorded as an increase in absorption at 412 nm (B, D). Error bars indicate the standard deviation for three experimental replicates.

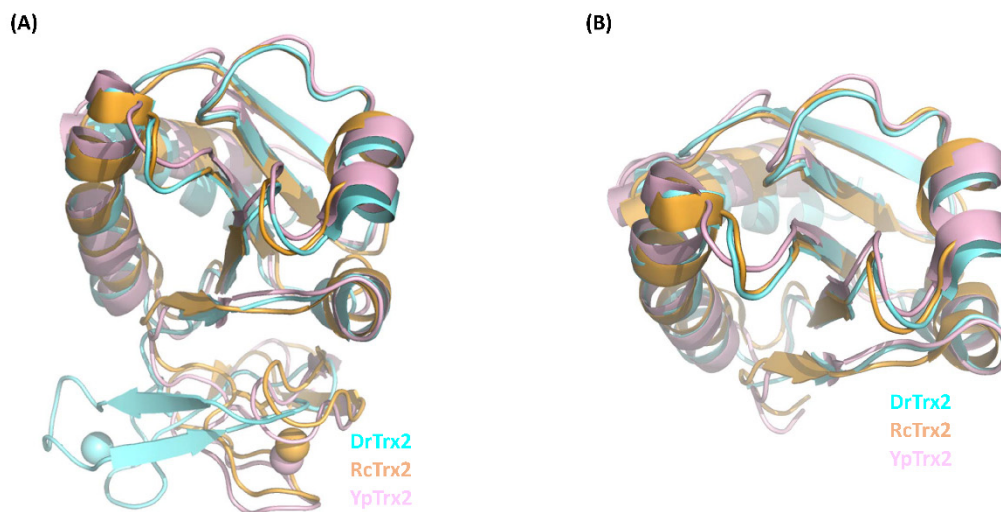

**Figure S5. Structural comparison of DrTrx2, RcTrx2, and YpTrx2.** Superimposition of the overall structures of DrTrx2, RcTrx2, and YpTrx2 (A) and the C-terminal Trx-fold domains of DrTrx2, RcTrx2, and YpTrx2 (B). Structures are shown as cartoon representation and the bound zinc ions are shown as sphere.

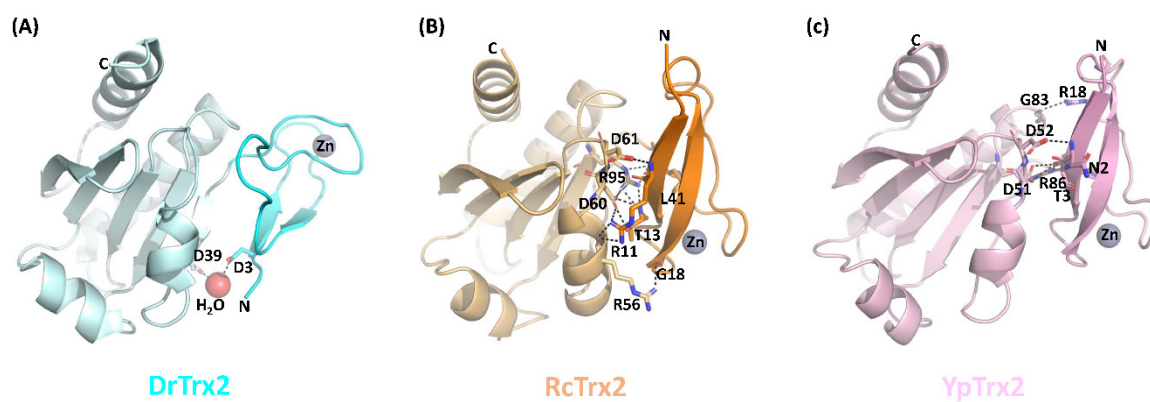

**Figure S6. Interdomain interactions.** Residues involved in the interdomain hydrogen network of DrTrx2 (A), RcTrx2 (B), and YpTrx2 (C) are shown as sticks and the hydrogen bonds are indicated as dotted black lines. Zinc ions and water molecule are represented as spheres. Overall structures are indicated as cartoon representation. Different colour intensity is used to distinguish the N- (weak) and C-terminal (strong) domain of Trx2.

## 2. Supplementary tables

**Table S1.** Bacterial strains and plasmids used in this study

| Strain or plasmid     | Description                                                                                                                                                                                                                             | Reference  |
|-----------------------|-----------------------------------------------------------------------------------------------------------------------------------------------------------------------------------------------------------------------------------------|------------|
| <b>Strains</b>        |                                                                                                                                                                                                                                         |            |
| <i>D. radiodurans</i> |                                                                                                                                                                                                                                         |            |
| R1                    | wild-type (ATCC13939)                                                                                                                                                                                                                   | Lab stock  |
| $\Delta trx1$         | <i>trx1</i> null mutant, Km <sup>r</sup>                                                                                                                                                                                                | This study |
| $\Delta trx2$         | <i>trx2</i> null mutant, Km <sup>r</sup>                                                                                                                                                                                                | This study |
| <i>E. coli</i>        |                                                                                                                                                                                                                                         |            |
| DH5 $\alpha$          | Host for plasmid subclones                                                                                                                                                                                                              | Lab stock  |
| BL21 (DE3)            | Host for protein expression                                                                                                                                                                                                             | Lab stock  |
| <b>Plasmids</b>       |                                                                                                                                                                                                                                         |            |
| pET22b                | IPTG-inducible expression vector with N-terminal Histag, Amp <sup>r</sup>                                                                                                                                                               | This study |
| pET-TrxR              | pET22b a derivative for expression of <i>trxR</i>                                                                                                                                                                                       | This study |
| pET-Trx1              | pET22b a derivative for expression of <i>trx1</i>                                                                                                                                                                                       | This study |
| pET-Trx2              | pET22b a derivative for expression of <i>trx2</i>                                                                                                                                                                                       | This study |
| pET-Trx1 (C29S)       | pET22b a derivative for expression of <i>trx1</i> (C29S)                                                                                                                                                                                | This study |
| pET-Trx1 (C32S)       | pET22b a derivative for expression of <i>trx1</i> (C32S)                                                                                                                                                                                | This study |
| pET-Trx2 (C7S)        | pET22b a derivative for expression of <i>trx2</i> (C7S)                                                                                                                                                                                 | This study |
| pET-Trx2 (C27S)       | pET22b a derivative for expression of <i>trx2</i> (C27S)                                                                                                                                                                                | This study |
| pET-Trx2 (C7S, C27S)  | pET22b a derivative for expression of <i>trx2</i> (C7S, C27S)                                                                                                                                                                           | This study |
| pET-Trx2 (C64S)       | pET22b a derivative for expression of <i>trx2</i> (C64S)                                                                                                                                                                                | This study |
| pET-Trx2 (C67S)       | pET22b a derivative for expression of <i>trx2</i> (C67S)                                                                                                                                                                                | This study |
| pRD4-Trx1             | pRADZ4 a derivative for expression of <i>trx1</i>                                                                                                                                                                                       | This study |
| pRD4-Trx2             | pRADZ4 a derivative for expression of <i>trx2</i>                                                                                                                                                                                       | This study |
| pkatAPH3              | PUC19 containing <i>aph</i> and <i>D. radiodurans katA</i> promoter; 2.3 kb; Km <sup>r</sup>                                                                                                                                            | Lab stock  |
| pRADZ4                | <i>E. coli-D. radiodurans</i> shuttle vector carrying <i>D. radiodurans groES</i> promoter regulated <i>LacZ</i> and promoter of <i>dr1124</i> ; 10 kb; Amp <sup>r</sup> in <i>E. coli</i> and Cm <sup>r</sup> in <i>D. radiodurans</i> | Lab stock  |

**Table S2.** Primers used for gene cloning.

| Primer                | Sequence (5' to 3')                                         | Description                                       |
|-----------------------|-------------------------------------------------------------|---------------------------------------------------|
| Kan-diaF              | TACCTGCGCCGGTTGCATTCGATTCC                                  | Diagnostic PCR                                    |
| Kan-diaR              | TAGGAATCGAATGCAACCGGCGCAGG                                  |                                                   |
| <i>dr0944</i> upF     | TACTCGAGCATCGTCATCATGAC ( <i>Xho</i> I)                     | Construction of pKatAPH3- <i>dr0944</i>           |
| <i>dr0944</i> upR     | TAGATATCGAACCCCGAATTGCG ( <i>Eco</i> R V)                   |                                                   |
| <i>dr0944</i> downF   | TAGGATCCTTTTCAAGCCCTCAT ( <i>Bam</i> H I)                   |                                                   |
| <i>dr0944</i> downR   | TAGCATGCGCGGTGGATATGGCG ( <i>Sph</i> I)                     |                                                   |
| <i>dr0944</i> diaF    | TAGGTGCGTGAGCTGCGGCA                                        |                                                   |
| <i>dr0944</i> diaR    | TACCGGCATTCCCCCGCACA                                        |                                                   |
| <i>dra0164</i> upF    | TACTCGAGATCGG CTGACGGTGCCG ( <i>Xho</i> I)                  | Construction of pKatAPH3- <i>dra0164</i>          |
| <i>dra0164</i> upR    | TAGATATCGGGGTCTCCGGGGGAAA ( <i>Eco</i> R V)                 |                                                   |
| <i>dra0164</i> downF  | TAGGATCCACGGCGCTGCTTCGCTGG ( <i>Bam</i> H I)                |                                                   |
| <i>dra0164</i> downR  | TAGCATGCGTGCTGGGTGCTGGCGGT ( <i>Sph</i> I)                  |                                                   |
| <i>dra0164</i> diaF   | TAATGACTGACCTGCTCGAC                                        |                                                   |
| <i>dra0164</i> diaR   | TAAACTGCCGGGCATACTCC                                        |                                                   |
| p4_ <i>dr0944</i> F   | TA <del>ACTAGT</del> ATGCGGGCCAGCATACCC ( <i>Spe</i> I)     | pRADZ4- <i>dr0944</i>                             |
| p4_ <i>dr0944</i> R   | TAGCGGCCGCTCAGTTGACAGCGACCC GAG ( <i>Not</i> I)             |                                                   |
| p4_ <i>dra0164</i> F  | TA <del>ACTAGT</del> ATGAGTGACATCCTGACC ( <i>Spe</i> I)     | pRADZ4- <i>dra0164</i>                            |
| p4_ <i>dra0164</i> R  | TAGCGGCCGCTCAGGAAAGCTGGTTGAGGTG ( <i>Not</i> I)             |                                                   |
| <i>dr1982</i> F       | TACATATGCATCATCATCATCATACGGCACCTAC TGCACAC ( <i>Nde</i> I)  | pET22b- <i>dr1982</i>                             |
| <i>dr1982</i> R       | TACTCGAGTCAGTCGGCAGCCGTGACCTC ( <i>Xho</i> I)               |                                                   |
| <i>dr0944</i> F       | TACATATGCATCATCATCATCATATAAGCCTGTGGA CTCACG ( <i>Nde</i> I) | pET22b- <i>dr0944</i>                             |
| <i>dr0944</i> R       | TACTCGAGTCAGTTGA AGCGACCCC ( <i>Xho</i> I)                  |                                                   |
| <i>dra0164</i> F      | TACATATGCATCATCATCATCATAGTGACATCCT GACCTGT ( <i>Nde</i> I)  | pET22b- <i>dra0164</i>                            |
| <i>dra0164</i> R      | TACTCGAGTCAGGAAAGCTGGTTGAGGTG ( <i>Xho</i> I)               |                                                   |
| <i>dr0944_C29S</i> F  | GGGCGCCCTGGAGTGGCCCTTGC                                     | Site-directed mutagenesis of <i>dr0944</i> (C29S) |
| <i>dr0944_C29S</i> R  | GCAAGGGCCACTCCAGGGCGCCC                                     |                                                   |
| <i>dr0944_C32S</i> F  | CCCTGGTGTGGCCCTAGCCGCATC                                    | Site-directed mutagenesis of <i>dr0944</i> (C32S) |
| <i>dr0944_C32S</i> R  | GATGCGGCTAGGGCCACACCAGGG                                    |                                                   |
| <i>dra0164_C7S</i> F  | GTGACATCCTGACCAGTACCCACTGCCAG                               | Site-directed mutagenesis of <i>dra0164</i> (C7S) |
| <i>dra0164_C7S</i> R  | CTGGCAGTGGTACTGGTCAGGATGTCAC                                |                                                   |
| <i>dra0164_C27S</i> F | AGGTGCCGAGCAGCGCCCGCTGC                                     | Site-directed                                     |



|                       |                         |                                                    |
|-----------------------|-------------------------|----------------------------------------------------|
| <i>dra0164_C27S</i> R | GCAGCGGGCGCTGCTCGGCACCT | mutagenesis of <i>dra0164</i> (C27S)               |
| <i>dra0164_C64S</i> F | GGCGCCGTGGAGCGGCCCTG    | Site-directed mutagenesis of <i>dra0164</i> (C64S) |
| <i>dra0164_C64S</i> R | CAGGGGCCGCTCCACGGCGCC   |                                                    |
| <i>dra0164_C67S</i> F | GGTGCGGCCCCAGCCGCGTGATG | Site-directed mutagenesis of <i>dra0164</i> (C67S) |
| <i>dra0164_C67S</i> R | CATCACGCGGCTGGGGCCGCACC |                                                    |
| <i>dr0944</i> TF      | TGACCCTGGTCGACTTCTGG    | RT-PCR                                             |
| <i>dr0944</i> TR      | CTTGACGCGGCCTTCGTACT    |                                                    |
| <i>dra0164</i> TF     | GTCAACGTGGACGAGAACCC    | RT-PCR                                             |
| <i>dra0164</i> TR     | CCATCTGGTCCACCTCTTCCC   |                                                    |

**Table S3.** Zinc concentrations measured by ICP-OES

| Sample         | Trx concentration<br>(mg/ml) | Trx concentration<br>( $\mu$ M) | Element/<br>Wavelength(nm) | Zn concentration<br>(mg/L) | Zn concentration<br>( $\mu$ M) | Trx:Zn ratio |
|----------------|------------------------------|---------------------------------|----------------------------|----------------------------|--------------------------------|--------------|
| DrTrx2         | 0.2                          | 12.87                           | Zn/206.2                   | 1.17                       | 17.89                          | 1:1.39       |
| DrTrx2<br>C7S  | 0.2                          | 12.87                           | Zn/206.2                   | 0.53                       | 8.11                           | 1:0.63       |
| DrTrx2<br>C27S | 0.2                          | 12.87                           | Zn/206.2                   | 0.48                       | 7.34                           | 1:0.57       |
